# Supplementary material for: Quality of antenatal care services in Rwanda: assessing practices of health care providers
Source: Springer Nature journal article supplement (doi:10.1186/s12913-018-3694-5), 2018-11-19
Supplement: MOESM1 [file 16279814]

**ID.**

|  |  |  |
|--|--|--|
|  |  |  |
|--|--|--|

**A. SOCIAL-DEMOGRAPHIC INFORMATION INFORMATION**

**A1.** What is your

1. Province.....
2. District .....
3. District Hospital .....
4. Health center.....

**A2.** How old are you (Years)?.....

**A3.** Sex

1.  Male
2.  Female

**A4.** Are you?

1.  Midwife?
2.  Nurse)?
3.  Auxiliary nurse?
4.  Other, specify. ....

**A5.** When was the last time that you attended to a pregnant woman at an ANC Clinic? **Tick one best response. If the respondent has never attended antenatal care client, thank her and close the interview**

|                          |                        |
|--------------------------|------------------------|
| 1. <input type="radio"/> | It has never happened  |
| 2. <input type="radio"/> | In the past week       |
| 3. <input type="radio"/> | In the past Month      |
| 4. <input type="radio"/> | In the past 6 months   |
| 5. <input type="radio"/> | 6 Months ago or longer |

**A6.** How many years of experience in your current position?

|                          |                  |
|--------------------------|------------------|
| 1. <input type="radio"/> | Less than 1 year |
| 2. <input type="radio"/> | 1-3 years        |
| 3. <input type="radio"/> | 4-6 years        |
| 4. <input type="radio"/> | Over 6 years     |

**A7.**What is the highest level of education you have completed?

|                                                                                                                                               |                                                          |
|-----------------------------------------------------------------------------------------------------------------------------------------------|----------------------------------------------------------|
| 1. <input type="radio"/>                                                                                                                      | A2 (last 3years of secondary school in nursing sciences) |
| 2. <input type="radio"/>                                                                                                                      | A1 A1 (3years of training after secondary school)        |
| 3. <input type="radio"/>                                                                                                                      | A0 (4years of training after secondary school)           |
| 4. <input type="radio"/>                                                                                                                      | Other, specify.....                                      |
| <b>B. IN-SERVICE TRAINING</b>                                                                                                                 |                                                          |
| <b>B1.a.</b> Have you been invited to any in-service training sessions in ANC services during the past 2 years?<br><b>(If no jump to B6)</b>  |                                                          |
| 1. <input type="radio"/>                                                                                                                      | Yes                                                      |
| 2. <input type="radio"/>                                                                                                                      | No                                                       |
| <b>B1.b.</b> If yes, have you attended any in-service training sessions in ANC services during the past 2 years?<br><b>(If no jump to B6)</b> |                                                          |
| 1. <input type="radio"/>                                                                                                                      | Yes                                                      |
| 2. <input type="radio"/>                                                                                                                      | No, I have not attended any training                     |

|                                                                                                                                     |                                                                                                                                                                                             |
|-------------------------------------------------------------------------------------------------------------------------------------|---------------------------------------------------------------------------------------------------------------------------------------------------------------------------------------------|
| <b>B2.</b> How many times have you been to ANC in-service training in the past year (1 year ago now)?<br>Number of times.....       |                                                                                                                                                                                             |
| <b>B3.</b> What were the themes in the in-service training session/s that you have attended? <b>(More than one answer possible)</b> |                                                                                                                                                                                             |
| 1. <input type="radio"/>                                                                                                            | How to receive the client in ANC clinic and take history (a kind reception)                                                                                                                 |
| 2. <input type="radio"/>                                                                                                            | Physical examination of the client (Observe, e.g skin coloration, jaundice, gait, edema etc.. and taking the vital signs (measuring body temperature, BP, Heart rate, Respiratory rate....) |
| 3. <input type="radio"/>                                                                                                            | How to manage clients who are victims of sexual violence                                                                                                                                    |
| 4. <input type="radio"/>                                                                                                            | How to manage ANC data                                                                                                                                                                      |
| 5. <input type="radio"/>                                                                                                            | Focalized antenatal care (FANC) [How to sensitize women to continuously consult for ANC]                                                                                                    |
| 6. <input type="radio"/>                                                                                                            | Warning signs of pregnancy complications                                                                                                                                                    |
| 7. <input type="radio"/>                                                                                                            | Family Planning                                                                                                                                                                             |
| 8. <input type="radio"/>                                                                                                            | Sexually transmitted diseases (HIV/AIDS, syphilis, gonorrhoea, chlamydia etc.)                                                                                                              |
| 9. <input type="radio"/>                                                                                                            | Other, specify .....                                                                                                                                                                        |
| <b>B4.</b> Did the in-service training improve your ANC service delivery                                                            |                                                                                                                                                                                             |
| 1. <input type="radio"/>                                                                                                            | Yes                                                                                                                                                                                         |
| 2. <input type="radio"/>                                                                                                            | No                                                                                                                                                                                          |
| <b>B5.a.</b> When you received ANC training, did it include hands on practical training?                                            |                                                                                                                                                                                             |
| 1. <input type="radio"/>                                                                                                            | Yes                                                                                                                                                                                         |
| 2. <input type="radio"/>                                                                                                            | No                                                                                                                                                                                          |
| <b>B5.b.</b> If yes, what kind of practical training? <b>( More than one response possible)</b>                                     |                                                                                                                                                                                             |
| 1. <input type="radio"/>                                                                                                            | General assessment of pregnant woman)                                                                                                                                                       |

|                                                                                                                            |                                                                          |
|----------------------------------------------------------------------------------------------------------------------------|--------------------------------------------------------------------------|
| 2. <input type="radio"/>                                                                                                   | Estimating gestational age from the fundal height measurement            |
| 3. <input type="radio"/>                                                                                                   | Diagnosing pregnancy                                                     |
| 4. <input type="radio"/>                                                                                                   | Assessing the fetus (Position of the fetus, fetal heartbeats etc.)       |
| 5. <input type="radio"/>                                                                                                   | Diagnosing disorders of pregnancy (High/Low Blood Pressure, Anemia etc.) |
| 6. <input type="radio"/>                                                                                                   | Other, specify.....                                                      |
| <b>B6.</b> When was the last time you received training in ANC?                                                            |                                                                          |
| 1. <input type="radio"/>                                                                                                   | In the past week                                                         |
| 2. <input type="radio"/>                                                                                                   | In the past month                                                        |
| 3. <input type="radio"/>                                                                                                   | In the past 6 months                                                     |
| 4. <input type="radio"/>                                                                                                   | In the past year                                                         |
| 5. <input type="radio"/>                                                                                                   | In the past 5 years                                                      |
| 6. <input type="radio"/>                                                                                                   | 5 years ago or longer                                                    |
| 7. <input type="radio"/>                                                                                                   | Do not remember                                                          |
| 8. <input type="radio"/>                                                                                                   | I have never received training in ANC                                    |
| <b>C. WORK FEEDBACK</b>                                                                                                    |                                                                          |
| <b>C1.a.</b> Do you receive feedback on your work performance from your superior or colleagues?                            |                                                                          |
| 1. <input type="radio"/>                                                                                                   | Yes                                                                      |
| 2. <input type="radio"/>                                                                                                   | No                                                                       |
| <b>C1.b.</b> If yes, how many times have you received feedback on your work performance in the past year?                  |                                                                          |
| 1. <input type="radio"/>                                                                                                   | Once                                                                     |
| 2. <input type="radio"/>                                                                                                   | 2 times                                                                  |
| 3. <input type="radio"/>                                                                                                   | 3 times                                                                  |
| 4. <input type="radio"/>                                                                                                   | 4 times or more                                                          |
| <b>D. CLIENT INFORMATION AND EDUCATION MATERIAL FOR CLIENTs</b>                                                            |                                                                          |
| <b>D1.a.</b> What type of client information, education and communication materials for antenatal care are available here? |                                                                          |
| 1. <input type="radio"/>                                                                                                   | None                                                                     |
| 2. <input type="radio"/>                                                                                                   | Posters                                                                  |
| 3. <input type="radio"/>                                                                                                   | Cards                                                                    |
| 4. <input type="radio"/>                                                                                                   | Take-home leaflets                                                       |
| 5. <input type="radio"/>                                                                                                   | Other,specify.....                                                       |
| <b>D1.b.</b> If available, what is the their content?                                                                      |                                                                          |
| 1. <input type="radio"/>                                                                                                   | On warning signs of complications of pregnancy                           |
| 2. <input type="radio"/>                                                                                                   | On Family planning                                                       |
| 3. <input type="radio"/>                                                                                                   | On Sexually transmitted diseases/HIV/AIDS                                |
| 4. <input type="radio"/>                                                                                                   | On postpartum and newborn care                                           |
| 5. <input type="radio"/>                                                                                                   | On Breast Feeding                                                        |
| 6. <input type="radio"/>                                                                                                   | On Maternal and antenatal nutrition                                      |

|                                                                                                                                                                                                               |                                                                |
|---------------------------------------------------------------------------------------------------------------------------------------------------------------------------------------------------------------|----------------------------------------------------------------|
| 7. <input type="radio"/>                                                                                                                                                                                      | Other, specify                                                 |
| <b>D2.</b> Are any antenatal care information, education and communication activities targeted at men?                                                                                                        |                                                                |
| 1. <input type="radio"/>                                                                                                                                                                                      | Yes, there are some specifically for men                       |
| 2. <input type="radio"/>                                                                                                                                                                                      | No, there is none specifically for men                         |
| 3. <input type="radio"/>                                                                                                                                                                                      | Yes, together with wife when he accompanies her to ANC clinic  |
| 4. <input type="radio"/>                                                                                                                                                                                      | Don't know                                                     |
| <b>E. ANC SERVICES</b>                                                                                                                                                                                        |                                                                |
| <b>E1.</b> How often are antenatal care services provided in this health center?                                                                                                                              |                                                                |
| 1. <input type="radio"/>                                                                                                                                                                                      | Every day apart from weekends                                  |
| 2. <input type="radio"/>                                                                                                                                                                                      | 2 days per week                                                |
| 3. <input type="radio"/>                                                                                                                                                                                      | 3 days per week                                                |
| 4. <input type="radio"/>                                                                                                                                                                                      | 4 days or more per week                                        |
| <b>E2.</b> Does it ever happen that you contact the CHW in the villages and ask him/her to send the pregnant women to the ANC clinic?                                                                         |                                                                |
| 1. <input type="radio"/>                                                                                                                                                                                      | Yes                                                            |
| 2. <input type="radio"/>                                                                                                                                                                                      | No                                                             |
| <b>E3.</b> How many minutes on average does a consultation with a pregnant woman take?                                                                                                                        |                                                                |
| Number minutes.....                                                                                                                                                                                           |                                                                |
| <b>E4.a.</b> After an ANC consultation, do you tell the woman a date for the next visit to pay to the ANC clinic? <b>(If 1 or 6 jump to E.5)</b>                                                              |                                                                |
| 1. <input type="radio"/>                                                                                                                                                                                      | Always tells her                                               |
| 2. <input type="radio"/>                                                                                                                                                                                      | Often                                                          |
| 3. <input type="radio"/>                                                                                                                                                                                      | Sometimes                                                      |
| 4. <input type="radio"/>                                                                                                                                                                                      | Never                                                          |
| 5. <input type="radio"/>                                                                                                                                                                                      | We write the date on his card that she takes home              |
| 6. <input type="radio"/>                                                                                                                                                                                      | We tell her and write the date on his card that she takes home |
| <b>E.4.b.</b> If not always, when do you give the pregnant woman a set time for the next visit?                                                                                                               |                                                                |
| 1. <input type="radio"/>                                                                                                                                                                                      | When the woman asks for it                                     |
| 2. <input type="radio"/>                                                                                                                                                                                      | Only when I suspect a complicated pregnancy                    |
| 3. <input type="radio"/>                                                                                                                                                                                      | If the woman had a complicated pregnancy earlier               |
| 4. <input type="radio"/>                                                                                                                                                                                      | When a woman has done 4 visits and has a normal pregnancy      |
| 5. <input type="radio"/>                                                                                                                                                                                      | Other reason, specify .....                                    |
| <b>E.5.</b> How many visits should a pregnant woman at least pay to the ANC during the course of her pregnancy if it is normal and with no complications?                                                     |                                                                |
| 1. <input type="radio"/>                                                                                                                                                                                      | 1                                                              |
| 2. <input type="radio"/>                                                                                                                                                                                      | 2                                                              |
| 3. <input type="radio"/>                                                                                                                                                                                      | 3                                                              |
| 4. <input type="radio"/>                                                                                                                                                                                      | 4                                                              |
| 5. <input type="radio"/>                                                                                                                                                                                      | 4 or more                                                      |
| 6. <input type="radio"/>                                                                                                                                                                                      | I don't know                                                   |
| <b>E6.</b> What symptoms and warning signs of pregnancy would prompt you to refer a woman to a hospital?<br><b>Do not Read out list. You may tick more than one option/Tick as many responses as possible</b> |                                                                |
| 1. <input type="radio"/>                                                                                                                                                                                      | Previous C-Section Scars                                       |

|                           |                                  |
|---------------------------|----------------------------------|
| 2. <input type="radio"/>  | Previous stillbirth              |
| 3. <input type="radio"/>  | Hypertension/Hypotension         |
| 4. <input type="radio"/>  | Visual disturbances              |
| 5. <input type="radio"/>  | Headache                         |
| 6. <input type="radio"/>  | Swelling                         |
| 7. <input type="radio"/>  | Fits                             |
| 8. <input type="radio"/>  | Fever                            |
| 9. <input type="radio"/>  | Severe Abdominal Pain            |
| 10. <input type="radio"/> | Anaemia                          |
| 11. <input type="radio"/> | Pallor                           |
| 12. <input type="radio"/> | Fatigue                          |
| 13. <input type="radio"/> | Breathlessness                   |
| 14. <input type="radio"/> | Cessation of fetal movements     |
| 15. <input type="radio"/> | Abnormal Lie/Position of Fetus   |
| 16. <input type="radio"/> | Foul smelling discharge          |
| 17. <input type="radio"/> | Light bleeding/spotting          |
| 18. <input type="radio"/> | Hemorrhage/Heavy bleeding        |
| 19. <input type="radio"/> | Multiple pregnancy/large abdomen |
| 20. <input type="radio"/> | Exposure to violence             |
| 21. <input type="radio"/> | Pre-eclampsia                    |
| 22. <input type="radio"/> | Nausea and vomiting              |
| 23. <input type="radio"/> | Diabetes                         |
| 24. <input type="radio"/> | Diarrhoea                        |
| 25. <input type="radio"/> | Other,specify.....               |

**E7. What kind of advice and information do you give to pregnant women attending the ANC? Do not Read out list. Tick as many responses as possible**

|                          |                                                                                                            |
|--------------------------|------------------------------------------------------------------------------------------------------------|
| 1. <input type="radio"/> | Advice and information about diet and nutrition                                                            |
| 2. <input type="radio"/> | Discuss the place of birth                                                                                 |
| 3. <input type="radio"/> | Discuss with the woman what to do if there is a problem during pregnancy like bleeding convulsions or fits |
| 4. <input type="radio"/> | Discus children spacing or family planning (contraceptives)                                                |
| 5. <input type="radio"/> | Discuss Sexually transmitted diseases and HIV/AIDS                                                         |
| 6. <input type="radio"/> | Give advice and information on how to take care of the newborn                                             |
| 7. <input type="radio"/> | Discuss exposure to violence during the pregnancy or before                                                |
| 8. <input type="radio"/> | Other-specify                                                                                              |

**F. VIOLENCE**

**F1. Have you ever encountered a pregnant woman in the clinic exposed to violence from her husband/partner?**

|                          |                             |
|--------------------------|-----------------------------|
| 1. <input type="radio"/> | Yes                         |
| 2. <input type="radio"/> | No                          |
| 3. <input type="radio"/> | Don't Know/I don't remember |

**F2. Have you ever encountered a pregnant woman in the clinic exposed to violence from any other family member or friend?**

|                          |                             |
|--------------------------|-----------------------------|
| 1. <input type="radio"/> | Yes                         |
| 2. <input type="radio"/> | No                          |
| 3. <input type="radio"/> | Don't Know/I don't remember |

**F3. Have you ever been trained in how to manage a pregnant woman who has been exposed to violence in**

|                                                                                                                                                                    |                                                                  |
|--------------------------------------------------------------------------------------------------------------------------------------------------------------------|------------------------------------------------------------------|
| the ANC clinic?                                                                                                                                                    |                                                                  |
| 1. <input type="radio"/>                                                                                                                                           | Yes                                                              |
| 2. <input type="radio"/>                                                                                                                                           | No                                                               |
| 3. <input type="radio"/>                                                                                                                                           | Don't Know/I don't remember                                      |
| <b>F4.</b> What would you do if a pregnant woman tells you that she is exposed to violence? (Tick as many responses as mentioned)                                  |                                                                  |
| 1. <input type="radio"/>                                                                                                                                           | Talk to her and let her tell her story                           |
| 2. <input type="radio"/>                                                                                                                                           | Ask her to come back within 1-2 weeks                            |
| 3. <input type="radio"/>                                                                                                                                           | Refer her to a district hospital                                 |
| 4. <input type="radio"/>                                                                                                                                           | Advice her to seek care at a shelter (One Stop (One Stop clinic) |
| 5. <input type="radio"/>                                                                                                                                           | Suggest that she brings her husband/partner to the next visit    |
| 6. <input type="radio"/>                                                                                                                                           | Suggest that she leaves her husband/partner                      |
| 7. <input type="radio"/>                                                                                                                                           | Any other advice .....                                           |
| <b>F5.</b> Is parental or spousal consent required for any ANC visits for adolescents?                                                                             |                                                                  |
| 1. <input type="radio"/>                                                                                                                                           | Yes                                                              |
| 2. <input type="radio"/>                                                                                                                                           | No                                                               |
| 3. <input type="radio"/>                                                                                                                                           | Don't know                                                       |
| <b>G. EQUIPMENT</b>                                                                                                                                                |                                                                  |
| <b>G1.</b> Which equipment that you require for ANC is available? (Read, Observe Tick)                                                                             |                                                                  |
| 1. <input type="radio"/>                                                                                                                                           | Armoire                                                          |
| 2. <input type="radio"/>                                                                                                                                           | Balance pèse personne avec toise                                 |
| 3. <input type="radio"/>                                                                                                                                           | Bassin réiforme (haricot)                                        |
| 4. <input type="radio"/>                                                                                                                                           | Toise drawn on the wall                                          |
| 5. <input type="radio"/>                                                                                                                                           | Bureau                                                           |
| 6. <input type="radio"/>                                                                                                                                           | Boite à coton                                                    |
| 7. <input type="radio"/>                                                                                                                                           | Mettre luban                                                     |
| 8. <input type="radio"/>                                                                                                                                           | Intebe (3)                                                       |
| 9. <input type="radio"/>                                                                                                                                           | Chariot de soins                                                 |
| 10. <input type="radio"/>                                                                                                                                          | Cupule inox                                                      |
| 11. <input type="radio"/>                                                                                                                                          | Détecteur de pouls fœtal et gel                                  |
| 12. <input type="radio"/>                                                                                                                                          | Escabeau 2 marches                                               |
| 13. <input type="radio"/>                                                                                                                                          | Kit DIU                                                          |
| 14. <input type="radio"/>                                                                                                                                          | Kit spéculum vaginal                                             |
| 15. <input type="radio"/>                                                                                                                                          | Paravent                                                         |
| 16. <input type="radio"/>                                                                                                                                          | Pisette (2)                                                      |
| 17. <input type="radio"/>                                                                                                                                          | Seau à pédale                                                    |
| 18. <input type="radio"/>                                                                                                                                          | Stéthoscope                                                      |
| 19. <input type="radio"/>                                                                                                                                          | Stéthoscope de Pinard                                            |
| 20. <input type="radio"/>                                                                                                                                          | Table d'examen gynécologique                                     |
| 21. <input type="radio"/>                                                                                                                                          | Tambour à compresses                                             |
| 22. <input type="radio"/>                                                                                                                                          | Tensiomètre                                                      |
| 23. <input type="radio"/>                                                                                                                                          | Plateau à instruments                                            |
| 24. <input type="radio"/>                                                                                                                                          | Gravidometre                                                     |
| 25. <input type="radio"/>                                                                                                                                          | Other,specify.....                                               |
| <b>H. WORK ENVIRONMENT AND OWN SKILLS</b>                                                                                                                          |                                                                  |
| <b>H1.</b> In your opinion, what are the three greatest problems facing the ANC services in this facility? What do you think are the solutions for these problems? |                                                                  |

| Problems                       | Solutions                      |
|--------------------------------|--------------------------------|
| 1. Insufficient health workers | 1. Recrute more health workers |
| 2. Not enough required skills  | 2. Regular training            |
| 3. Lack of equipment           | 3. Acquire more equipment      |
| 4. Other, specify...           | 4. Other, specify...           |

**H2.** Which are the 3 most important things that you need to improve as regards your own knowledge and skills?

|                          |                      |
|--------------------------|----------------------|
| 1. <input type="radio"/> | Further eduction     |
| 2. <input type="radio"/> | In- service training |
| 3. <input type="radio"/> | Salary Increase      |
| 4. <input type="radio"/> | Other                |

**ID**

|  |  |  |
|--|--|--|
|  |  |  |
|--|--|--|

**Separate temperate**

**A. CHECK LIST FOR ANC REGISTERS (Choose 5 Files randomly/Health center from all files of past one year)**

**B. SOCIAL-DEMOGRAPHIC INFORMATION INFORMATION**

**A1.** What is your

5. Province.....
6. District .....
7. District Hospital .....
8. Health center.....

**B.1.** How many ANC Visits are recorded?

Number of Recorded visits .....

**B.2.** Is the expected date of delivery calculated?

1.  Yes

2.  No

**B.3.** Is the gestational age at the first visit recorded?

1.  Yes

|                                                                                                                          |                                                                          |
|--------------------------------------------------------------------------------------------------------------------------|--------------------------------------------------------------------------|
| 2. <input type="radio"/>                                                                                                 | No                                                                       |
| <b>B4</b>                                                                                                                | What was the gestational age at the first visit<br>Number of weeks ..... |
| <b>B.5. Was maternal weight measured and recorded at each visit?</b>                                                     |                                                                          |
| 1. <input type="radio"/>                                                                                                 | During 1 <sup>st</sup> visit                                             |
| 2. <input type="radio"/>                                                                                                 | During 2 <sup>nd</sup> visit                                             |
| 3. <input type="radio"/>                                                                                                 | During 3 <sup>rd</sup> visit                                             |
| 4. <input type="radio"/>                                                                                                 | During 4th visit                                                         |
| 5. <input type="radio"/>                                                                                                 | Never                                                                    |
| <b>B.6. Was blood pressure measured and recorded at each visit?</b>                                                      |                                                                          |
| 1. <input type="radio"/>                                                                                                 | During 1 <sup>st</sup> visit                                             |
| 2. <input type="radio"/>                                                                                                 | During 2 <sup>nd</sup> visit                                             |
| 3. <input type="radio"/>                                                                                                 | During 3 <sup>rd</sup> visit                                             |
| 4. <input type="radio"/>                                                                                                 | During 4th visit                                                         |
| 5. <input type="radio"/>                                                                                                 | Never                                                                    |
| <b>B.7. Is the fetal heartbeats readings recorded?</b>                                                                   |                                                                          |
| 1. <input type="radio"/>                                                                                                 | During 1 <sup>st</sup> visit                                             |
| 2. <input type="radio"/>                                                                                                 | During 2 <sup>nd</sup> visit                                             |
| 3. <input type="radio"/>                                                                                                 | During 3 <sup>rd</sup> visit                                             |
| 4. <input type="radio"/>                                                                                                 | During 4th visit                                                         |
| 5. <input type="radio"/>                                                                                                 | Never                                                                    |
| <b>B.8. Is proteinuria measured and recorded?</b>                                                                        |                                                                          |
| 1. <input type="radio"/>                                                                                                 | During 1 <sup>st</sup> visit                                             |
| 2. <input type="radio"/>                                                                                                 | During 2 <sup>nd</sup> visit                                             |
| 3. <input type="radio"/>                                                                                                 | During 3 <sup>rd</sup> visit                                             |
| 4. <input type="radio"/>                                                                                                 | During 4th visit                                                         |
| 5. <input type="radio"/>                                                                                                 | Never                                                                    |
| <b>B.9. Are the results of Hemoglobin tests recorded for each visit?</b>                                                 |                                                                          |
| 1. <input type="radio"/>                                                                                                 | During 1 <sup>st</sup> visit                                             |
| 2. <input type="radio"/>                                                                                                 | During 2 <sup>nd</sup> visit                                             |
| 3. <input type="radio"/>                                                                                                 | During 3 <sup>rd</sup> visit                                             |
| 4. <input type="radio"/>                                                                                                 | During 4th visit                                                         |
| 5. <input type="radio"/>                                                                                                 | Never                                                                    |
| <b>B.10. Is Blood Sugar recorded?</b>                                                                                    |                                                                          |
| 1. <input type="radio"/>                                                                                                 | During 1 <sup>st</sup> visit                                             |
| 2. <input type="radio"/>                                                                                                 | During 2 <sup>nd</sup> visit                                             |
| 3. <input type="radio"/>                                                                                                 | During 3 <sup>rd</sup> visit                                             |
| 4. <input type="radio"/>                                                                                                 | During 4th visit                                                         |
| 5. <input type="radio"/>                                                                                                 | Never                                                                    |
| <b>B.11. Is number of pregnancies/Gravida (Number of previous pregnancies including the current pregnancy) recorded?</b> |                                                                          |
| 1. <input type="radio"/>                                                                                                 | Yes                                                                      |
| 2. <input type="radio"/>                                                                                                 | No                                                                       |
| <b>B.12. Are the results of syphilis test recorded?</b>                                                                  |                                                                          |
| 1. <input type="radio"/>                                                                                                 | Yes                                                                      |



|                                                                        |                                                   |
|------------------------------------------------------------------------|---------------------------------------------------|
| 2. <input type="radio"/>                                               | No                                                |
| <b>B.13.</b> Is provision of iron supplementation recorded?            |                                                   |
| 1. <input type="radio"/>                                               | Yes                                               |
| 2. <input type="radio"/>                                               | No                                                |
| <b>B.14.</b> Is provision of malaria prophylaxis (Super net) recorded? |                                                   |
| 1. <input type="radio"/>                                               | Yes                                               |
| 2. <input type="radio"/>                                               | No                                                |
| <b>B.15.</b> Is HIV test recorded?                                     |                                                   |
| 1. <input type="radio"/>                                               | Yes                                               |
| 2. <input type="radio"/>                                               | No                                                |
| <b>B.16.</b> Was tetanus Immunization given?                           |                                                   |
| 1. <input type="radio"/>                                               | Yes                                               |
| 2. <input type="radio"/>                                               | No                                                |
| 3. <input type="radio"/>                                               | No, she received it during previous pregnancy/ies |
| <b>B.17.</b> Is there any note on violence ongoing in the home?        |                                                   |
| 1. <input type="radio"/>                                               | Yes                                               |
| 2. <input type="radio"/>                                               | No                                                |
| <b>B.18.</b> Were Antihelmintic given                                  |                                                   |
|                                                                        | Yes                                               |
|                                                                        | No                                                |
